# Supplementary material
Source: HighWire-hosted journal article supplement (https://bmjopen.bmj.com/content/8/2/e017746)
Supplement: inline-supplementary-material-1 [file inline-supplementary-material-1.pdf]

Appendix Figure 1. Estimated incidence rates of CVD by quintile of SBP, by SF-12 physical summary score and race/ethnicity.

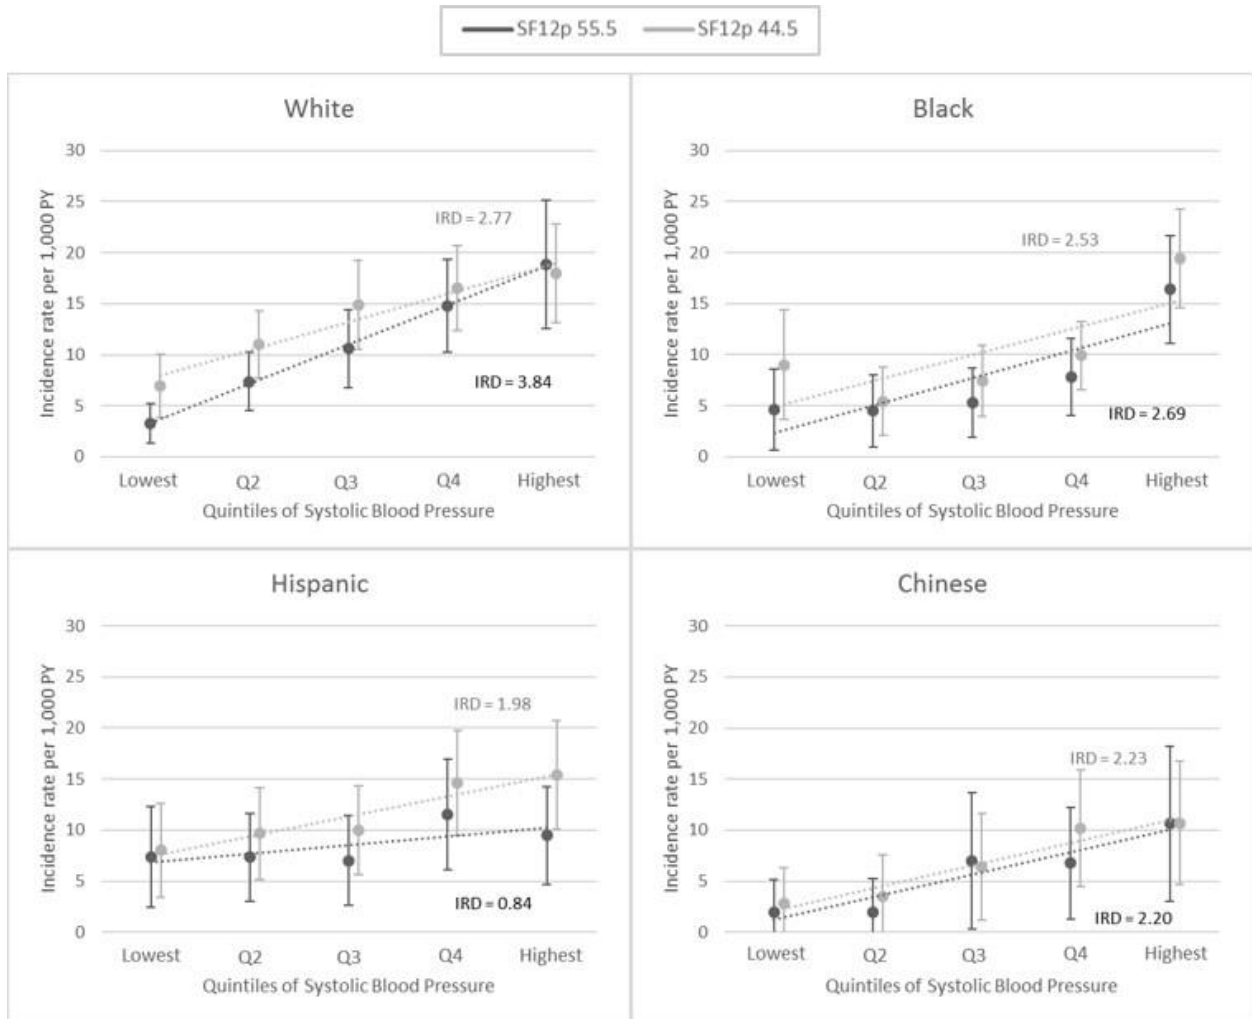

IRD: incidence rate difference, averaged across quintiles
